# Supplementary material for: Shared Genetic Background between Parkinson’s Disease and Schizophrenia: A Two-Sample Mendelian Randomization Study
Source: MDPI journal article supplement (doi:10.3390/brainsci11081042), 2021-08-06
Supplement: s1 [file s1]

## Supplementary Information

### Supplementary Figure S1. Forest and leave-one-out plots showing association with schizophrenia for each genetic instrument of Parkinson's disease (PD)

(A) Forest plot using 32 genetic instruments (PD) [1]. (B) Leave-one-out plot using 32 genetic instruments (PD) [1].

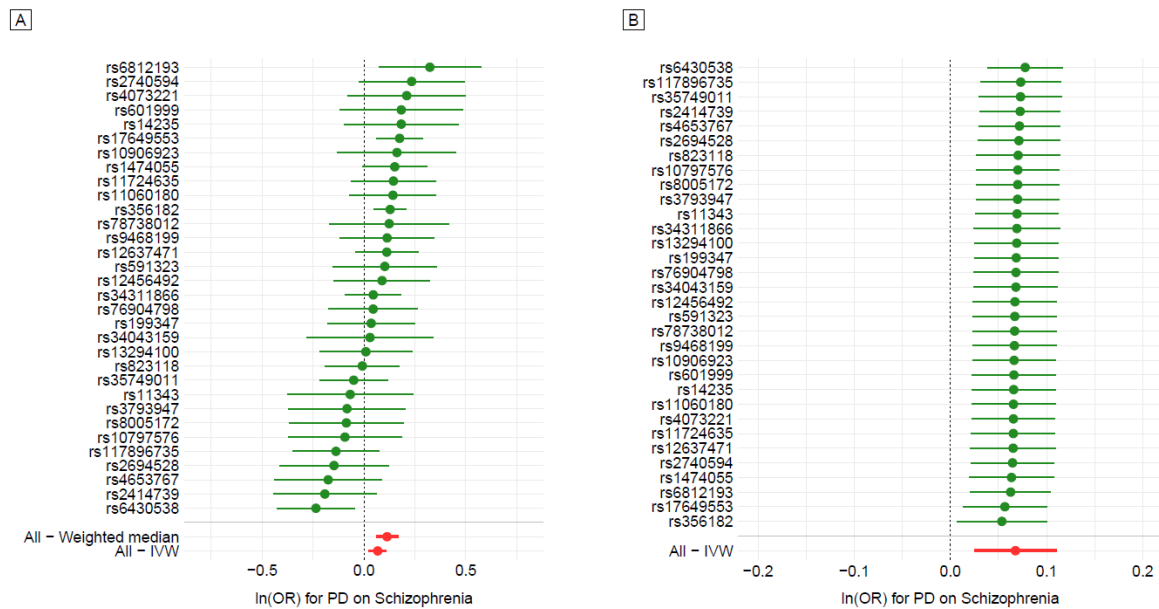

**Supplementary Table S1.** Genome-wide association studies used in this study.

| Author            | Consortium | No. of cases | No. of controls | No. of SNPs | Population | Sample size | Trait                                    | Year |
|-------------------|------------|--------------|-----------------|-------------|------------|-------------|------------------------------------------|------|
| Simon-Sanchez [2] | NA         | 1,713        | 3,978           | 453,218     | European   | 5,691       | Parkinson's disease                      | 2009 |
| Chang [1]         | IPDGC      | 6,476        | 302,042         | -           | European   | 308,518     | Parkinson's disease                      | 2017 |
| Ripke [3]         | PGC        | 35,476       | 46,839          | 9,444,231   | Mixed      | 82,315      | Schizophrenia                            | 2014 |
| Demontis [4]      | PGC        | 20,183       | 35,191          | 8,047,420   | European   | 55,374      | Attention deficit hyperactivity disorder | 2017 |
| Grove [5]         | PGC        | 18,382       | 27,969          | 6,440,259   | European   | 46,351      | Autism spectrum disorders                | 2017 |
| Sklar [6]         | PGC        | 7,481        | 9,250           | 2,427,221   | European   | 16,731      | Bipolar disorder                         | 2011 |
| Sullivan [7]      | PGC        | 9,240        | 9,519           | 1,235,110   | European   | 18,759      | Major depressive disorder                | 2013 |
| Lambert [8]       | IGAP       | 17,008       | 37,154          | 7,055,882   | European   | 54,162      | Alzheimer's disease                      | 2013 |
| Olfson [9]        | NA         | 1,897        | 1,932           | 917,030     | Mixed      | 3,829       | Alcohol dependence                       | 2012 |
| Furberg [10]      | TAG        | NA           | NA              | 2,459,119   | European   | 68,028      | Cigarettes smoked per day                | 2010 |
| Watanabe [11]     | UK Biobank | NA           | NA              | 9,567,039   | European   | 126,632     | Cannabis use - Ever taken cannabis       | 2019 |

SNP—single nucleotide polymorphism; IPDGC—International Parkinson's Disease Genomics Consortium; PGC—Psychiatric Genomics Consortium; IGAP—International Genomics of Alzheimer's Project; TAG—Tobacco, Alcohol and Genetics Consortium; NA—not available

**Supplementary Table S2.** Two-sample Mendelian randomization results of Parkinson's disease [2] (exposure trait) and schizophrenia [3] (outcome trait) using inverse variance weighting (IVW) and weighted median (WM).

|                         |                    | Main Mendelian randomization result (IVW) |                  |                       | Heterogeneity (IVW) |       |                           | Sensitivity (WM) |                       |
|-------------------------|--------------------|-------------------------------------------|------------------|-----------------------|---------------------|-------|---------------------------|------------------|-----------------------|
|                         |                    | No. of SNPs                               | OR (95% CI)      | <i>p</i>              | Q (Qdf)             | Q val | <i>I</i> <sup>2</sup> (%) | OR (95% CI)      | <i>p</i>              |
| P threshold for PD GWAS | 5×10 <sup>-8</sup> | 4                                         | 1.10 (1.05-1.15) | 3.49×10 <sup>-5</sup> | 2.54 (3)            | 0.47  | 0                         | 1.09 (1.02-1.15) | 3.77×10 <sup>-3</sup> |
|                         | 5×10 <sup>-7</sup> | 5                                         | 1.10 (1.06-1.14) | 7.00×10 <sup>-7</sup> | 2.89 (4)            | 0.58  | 0                         | 1.08 (1.02-1.14) | 3.13×10 <sup>-3</sup> |
|                         | 5×10 <sup>-6</sup> | 14                                        | 1.06 (1.03-1.09) | 6.64×10 <sup>-5</sup> | 15.35 (13)          | 0.29  | 15                        | 1.05 (1.01-1.10) | 7.10×10 <sup>-3</sup> |

SNPs—single nucleotide polymorphisms; PD—Parkinson's disease; GWAS—genome-wide association studies; OR—odds ratio; CI—confidence interval; Q—Cochran's heterogeneity statistic; Qdf—the degrees of freedom; *I*<sup>2</sup>—100%×(Q - Qdf)/Q [12].

**Supplementary Table S3.** Two-sample Mendelian randomization results of schizophrenia [3] (exposure trait) and Parkinson's disease [2] (outcome trait) using inverse variance weighting (IVW) and weighted median (WM).

|                          |                    | Main Mendelian randomization result (IVW) |                  |          | Heterogeneity (IVW) |       |                           | Sensitivity (WM) |          |
|--------------------------|--------------------|-------------------------------------------|------------------|----------|---------------------|-------|---------------------------|------------------|----------|
|                          |                    | No. of SNPs                               | OR (95% CI)      | <i>p</i> | Q (Qdf)             | Q val | <i>I</i> <sup>2</sup> (%) | OR (95% CI)      | <i>p</i> |
| P threshold for SCZ GWAS | 5×10 <sup>-8</sup> | 47                                        | 1.09 (0.91-1.28) | 0.31     | 40.66 (46)          | 0.70  | 0                         | 1.17 (0.89-1.45) | 0.19     |
|                          | 5×10 <sup>-7</sup> | 66                                        | 1.07 (0.91-1.23) | 0.40     | 62.53 (65)          | 0.56  | 0                         | 1.15 (0.88-1.42) | 0.24     |
|                          | 5×10 <sup>-6</sup> | 102                                       | 1.03 (0.89-1.17) | 0.72     | 111.30 (101)        | 0.23  | 9                         | 1.12 (0.91-1.34) | 0.24     |

SCZ—schizophrenia; GWAS—genome-wide association studies; SNPs—single nucleotide polymorphisms; OR—odds ratio; CI—confidence interval; Q—Cochran's heterogeneity statistic; Qdf—the degrees of freedom; *I*<sup>2</sup>—100%×(Q - Qdf)/Q [12]

**Supplementary Table S4.** Two-sample Mendelian randomization results of schizophrenia [3] (exposure trait) and Parkinson's disease [2] (outcome trait) using MR-Egger.

|                             |                    | MR-Egger    |                   |          | Heterogeneity (Egger) |       |                           | Pleiotropy (Egger)    |          |
|-----------------------------|--------------------|-------------|-------------------|----------|-----------------------|-------|---------------------------|-----------------------|----------|
|                             |                    | No. of SNPs | OR (95% CI)       | <i>p</i> | Q (Qdf)               | Q val | <i>I</i> <sup>2</sup> (%) | Intercept OR (95% CI) | <i>p</i> |
| P threshold for<br>SCZ GWAS | 5×10 <sup>-8</sup> | 47          | 0.58 (-0.01-1.18) | 0.30     | 40.05 (45)            | 0.68  | 0                         | 1.05 (0.97-1.13)      | 0.23     |
|                             | 5×10 <sup>-7</sup> | 66          | 0.82 (0.13-1.52)  | 0.65     | 63.14 (64)            | 0.51  | 0                         | 1.02 (0.96-1.08)      | 0.54     |
|                             | 5×10 <sup>-6</sup> | 102         | 0.92 (0.24-1.60)  | 0.82     | 112.31 (100)          | 0.19  | 11                        | 1.01 (0.96-1.06)      | 0.76     |

SCZ—schizophrenia; GWAS—genome-wide association studies; OR—odds ratio; CI, confidence interval; Q, Cochran's heterogeneity statistic; Qdf, the degrees of freedom; *I*<sup>2</sup>, 100%×(Q - Qdf)/Q [12]

**Supplementary Table S5.** Two-sample Mendelian randomization results of Parkinson's disease [2] (exposure trait) and schizophrenia [3] (outcome trait) using MR-Egger.

|                         |                    | MR-Egger    |                  |          | Heterogeneity (Egger) |       |                           | Pleiotropy (Egger)    |          |
|-------------------------|--------------------|-------------|------------------|----------|-----------------------|-------|---------------------------|-----------------------|----------|
|                         |                    | No. of SNPs | OR (95% CI)      | <i>p</i> | Q (Qdf)               | Q val | <i>I</i> <sup>2</sup> (%) | Intercept OR (95% CI) | <i>p</i> |
| P threshold for PD GWAS | 5×10 <sup>-8</sup> | 4           | 0.94 (0.76-1.12) | 0.61     | 1.18 (2)              | 0.56  | 0                         | 1.05 (0.99-1.11)      | 0.25     |
|                         | 5×10 <sup>-7</sup> | 5           | 0.98 (0.81-1.15) | 0.84     | 2.11 (3)              | 0.55  | 0                         | 1.03 (0.98-1.09)      | 0.28     |
|                         | 5×10 <sup>-6</sup> | 14          | 1.07 (0.94-1.21) | 0.30     | 16.60 (12)            | 0.17  | 28                        | 1.00 (0.97-1.03)      | 0.88     |

PD, Parkinson's disease; GWAS, genome-wide association studies; OR, odds ratio; CI, confidence interval; Q, Cochran's heterogeneity statistic; Qdf, the degrees of freedom; *I*<sup>2</sup>, 100%×(Q - Qdf)/Q [12]

**Supplementary Table S6.** Two-sample Mendelian randomization results of Parkinson's disease[1] (exposure trait) and schizophrenia[3] (outcome trait) using IVW and WM after removing outliers that exhibit pleiotropy detected by MR-PRESSO.

|                            |                    | Main Mendelian randomization Result (IVW) |                  |                       | Heterogeneity (IVW) |       |                           | Sensitivity (WM) |                       |
|----------------------------|--------------------|-------------------------------------------|------------------|-----------------------|---------------------|-------|---------------------------|------------------|-----------------------|
|                            |                    | No. of SNPs                               | OR (95% CI)      | <i>p</i>              | Q (Qdf)             | Q val | <i>I</i> <sup>2</sup> (%) | OR (95% CI)      | <i>p</i>              |
| P threshold for<br>PD GWAS | 5×10 <sup>-8</sup> | 32                                        | 1.07 (1.02-1.12) | 1.81×10 <sup>-3</sup> | 45.43 (31)          | 0.05  | 32                        | 1.12 (1.06-1.18) | 2.84×10 <sup>-5</sup> |
|                            | 5×10 <sup>-7</sup> | 34                                        | 1.06 (1.01-1.11) | 7.15×10 <sup>-3</sup> | 54.74 (33)          | 0.01  | 40                        | 1.12 (1.06-1.18) | 3.22×10 <sup>-5</sup> |
|                            | 5×10 <sup>-6</sup> | 38                                        | 1.06 (1.01-1.10) | 8.63×10 <sup>-3</sup> | 58.85 (37)          | 0.01  | 37                        | 1.12 (1.06-1.18) | 3.08×10 <sup>-5</sup> |

PD, Parkinson's disease; GWAS, genome-wide association studies; OR, odds ratio; CI, confidence interval; Q, Cochran's heterogeneity statistic;

Qdf, the degrees of freedom; *I*<sup>2</sup>, 100%×(Q - Qdf)/Q [12]

**Supplementary Table S7.** Two-sample Mendelian randomization results of Parkinson's disease[1] (exposure trait) and schizophrenia[3] (outcome trait) using MR-Egger after removing outliers that exhibit pleiotropy detected by MR-PRESSO.

|                         |                    | MR-Egger    |                  |          | Heterogeneity (Egger) |       |                           | Pleiotropy (Egger)    |          |
|-------------------------|--------------------|-------------|------------------|----------|-----------------------|-------|---------------------------|-----------------------|----------|
|                         |                    | No. of SNPs | OR (95% CI)      | <i>p</i> | Q (Qdf)               | Q val | <i>I</i> <sup>2</sup> (%) | Intercept OR (95% CI) | <i>p</i> |
| P threshold for PD GWAS | 5×10 <sup>-8</sup> | 32          | 1.10 (1.00-1.21) | 0.05     | 46.18 (30)            | 0.03  | 35                        | 1.00 (0.98-1.01)      | 0.49     |
|                         | 5×10 <sup>-7</sup> | 34          | 1.12 (1.01-1.23) | 0.03     | 54.20 (32)            | 0.01  | 41                        | 0.99 (0.98-1.00)      | 0.26     |
|                         | 5×10 <sup>-6</sup> | 38          | 1.12 (1.02-1.23) | 0.02     | 57.29 (36)            | 0.01  | 37                        | 0.99 (0.98-1.00)      | 0.17     |

PD—Parkinson's disease; GWAS—genome-wide association studies; OR—odds ratio; CI—confidence interval; Q—Cochran's heterogeneity statistic; Qdf—the degrees of freedom; *I*<sup>2</sup>—100%×(Q - Qdf)/Q [12]



## References

1. Chang, D.; Nalls, M.A.; Hallgrimsdottir, I.B.; Hunkapiller, J.; van der Brug, M.; Cai, F.; International Parkinson's Disease Genomics, C.; andMe Research, T.; Kerchner, G.A.; Ayalon, G.; et al. A meta-analysis of genome-wide association studies identifies 17 new Parkinson's disease risk loci. *Nat. Genet.* **2017**, *49*, 1511-1516.
2. Simon-Sanchez, J.; Schulte, C.; Bras, J.M.; Sharma, M.; Gibbs, J.R.; Berg, D.; Paisan-Ruiz, C.; Lichtner, P.; Scholz, S.W.; Hernandez, D.G.; et al. Genome-wide association study reveals genetic risk underlying Parkinson's disease. *Nat. Genet.* **2009**, *41*, 1308-1312.
3. Schizophrenia Working Group of the Psychiatric Genomics, C. Biological insights from 108 schizophrenia-associated genetic loci. *Nature* **2014**, *511*, 421-427.
4. Demontis, D.; Walters, R.K.; Martin, J.; Mattheisen, M.; Als, T.D.; Agerbo, E.; Belliveau, R.; Bybjerg-Grauholm, J.; Bækved-Hansen, M.; Cerrato, F.; et al. Discovery Of The First Genome-Wide Significant Risk Loci For ADHD. *bioRxiv* **2017**.
5. Grove, J.; Ripke, S.; Als, T.D.; Mattheisen, M.; Walters, R.; Won, H.; Pallesen, J.; Agerbo, E.; Andreassen, O.A.; Anney, R.; et al. Common risk variants identified in autism spectrum disorder. *bioRxiv* **2017**.
6. Psychiatric, G.C.B.D.W.G. Large-scale genome-wide association analysis of bipolar disorder identifies a new susceptibility locus near ODZ4. *Nat. Genet.* **2011**, *43*, 977-983.
7. Major Depressive Disorder Working Group of the Psychiatric, G.C.; Ripke, S.; Wray, N.R.; Lewis, C.M.; Hamilton, S.P.; Weissman, M.M.; Breen, G.; Byrne, E.M.; Blackwood, D.H.; Boomsma, D.I.; et al. A mega-analysis of genome-wide association studies for major depressive disorder. *Mol. Psychiatry* **2013**, *18*, 497-511.
8. Lambert, J.C.; Ibrahim-Verbaas, C.A.; Harold, D.; Naj, A.C.; Sims, R.; Bellenguez, C.; DeStafano, A.L.; Bis, J.C.; Beecham, G.W.; Grenier-Boley, B.; et al. Meta-analysis of 74,046 individuals identifies 11 new susceptibility loci for Alzheimer's disease. *Nat. Genet.* **2013**, *45*, 1452-1458.
9. Olfson, E.; Bierut, L.J. Convergence of genome-wide association and candidate gene studies for alcoholism. *Alcohol. Clin. Exp. Res.* **2012**, *36*, 2086-2094.
10. Tobacco; Genetics, C. Genome-wide meta-analyses identify multiple loci associated with smoking behavior. *Nat. Genet.* **2010**, *42*, 441-447.
11. Watanabe, K.; Stringer, S.; Frei, O.; Umičević Mirkov, M.; de Leeuw, C.; Polderman, T.J.C.; van der Sluis, S.; Andreassen, O.A.; Neale, B.M.; Posthuma, D. A global overview of pleiotropy and genetic architecture in complex traits. *Nat Genet* **2019**, *51*, 1339-1348.
12. Higgins, J.P.; Thompson, S.G.; Deeks, J.J.; Altman, D.G. Measuring inconsistency in meta-analyses. *BMJ* **2003**, *327*, 557-560.
